# Supplementary material for: Reducing zirconium(iv) phthalocyanines and the structure of a Pc4−Zr complex
Source: Royal Society of Chemistry journal article supplement (doi:10.1039/c5dt01778e), 2015-01-01
Supplement: c5dt01778e1.pdf [file c5dt01778e1.pdf]

## SUPPORTING INFORMATION

### Reducing Zirconium(IV) Phthalocyanines and the structure of a $\text{Pc}^{4-}\text{Zr}$ complex

Wen Zhou,<sup>a</sup> Rachel H. Platel,<sup>a</sup> Thiago Teixeira Tasso,<sup>b</sup> Taniyuki Furuyama,<sup>b</sup> Nagao Kobayashi<sup>b</sup> and Daniel B. Leznoff<sup>a</sup>

<sup>a</sup>*Department of Chemistry, Department of Chemistry, Simon Fraser University*

*dleznoff@sfu.ca*

<sup>b</sup>*Department of Chemistry, Graduate School of Science, Tohoku University*

*nagaok@m.tohoku.ac.jp*

### General procedure for the Reduction of $\text{PcZrCl}_2$ (**1**) with $\text{KC}_8$ and subsequent re-oxidation

A suspension of  $\text{KC}_8$  (1.1, 2.2, 3.3 or 4.4 equiv) was prepared in DME (10 mL).  $\text{PcZrCl}_2$  (**1**) (0.169 g, 0.25 mmol) was added to the  $\text{KC}_8$  suspension as a solid, with stirring. The reaction was left to stir for 24 h. The mixture was filtered through celite and the solvent removed *in vacuo*. The products were recrystallized from a 1:1 mixture of DME/hexanes and UV-vis spectra collected (Figure S2). For each sample, a DME solution of the recrystallized material (0.010 g, 0.017 mmol in 3 mL DME) was added to ferrocenium tetrafluoroborate (0.005 g, 0.017 mmol for mono-reduced species; stoichiometric amounts adjusted accordingly for re-oxidation of more highly reduced compounds) and the mixture stirred overnight. A turquoise reaction mixture was formed and the UV-vis spectra collected (Figure S2). The solvents were removed *in vacuo* and the residue analyzed by MALDI-TOF mass spectrometry.

For one equiv.  $\text{KC}_8$  with **1**: UV-vis: (THF)  $\lambda_{\text{max}}$  326, 526, 580, 618, 686 nm; MALDI-TOF MS of oxidized material,  $m/z$ : 1114.5 (37%  $[(\text{Pc}_2\text{Zr})]^+$ ), 674.2 (53%  $[(\text{PcZrCl})\text{K}]^+$ ), 640.2 (100%  $[(\text{PcZr})\text{K}]^+$ ), 621.2 (16%  $[(\text{PcZrOH}_2)]^+$ ).

For two equiv.  $\text{KC}_8$  with **1**: UV-vis: (THF)  $\lambda_{\text{max}}$  326, 526, 576 (sh, due to oxidation in UV-vis cell), 616 (sh, due to oxidation in UV-vis cell) nm; MALDI-TOF MS of oxidized material,  $m/z$ : 1114.5 (16%  $[(\text{Pc}_2\text{Zr})]^+$ ), 674.2 (9%  $[(\text{PcZrCl})\text{K}]^+$ ), 640.2 (100%  $[(\text{PcZr})\text{K}]^+$ ), 621.2 (25%  $[(\text{PcZrOH}_2)]^+$ ).

For three equiv.  $\text{KC}_8$  with **1**: UV-vis: (THF)  $\lambda_{\text{max}}$  322, 526 nm; MALDI-TOF MS of oxidized material,  $m/z$ : 1114.5 (16%  $[(\text{Pc}_2\text{Zr})]^+$ ), 640.2 (100%  $[(\text{PcZr})\text{K}]^+$ ), 621.2 (13%  $[(\text{PcZrOH}_2)]^+$ ).

#### Reaction of **1** with 1 equiv NaCp

NaCp (0.05 mL of a 2.0 M solution in THF, 0.100 mmol) was added *via* syringe to a suspension of  $\text{PcZrCl}_2$  (67.5 mg, 0.100 mmol) in THF (10 mL). After approximately 15 min the reaction mixture turned a plum purple colour. The reaction mixture was stirred at room temperature for 48 hours, before filtering through celite and removing the solvent *in vacuo*. X-ray quality crystals could not be obtained from the product mixture.

UV-vis: (THF)  $\lambda_{\text{max}}$  466(sh), 570, 587, 679 nm.

#### Reaction of **1** with 2 eq NaCp

NaCp (0.013 mL of a 2.0 M solution in THF, 0.25 mmol) was added *via* syringe to a suspension of  $\text{PcZrCl}_2$  (0.169 g, 0.25 mmol) in THF (10 mL). After approximately 15 min the reaction mixture turned a plum purple colour. The reaction mixture was stirred at room temperature for 48 h, before filtering through celite and removing the solvent *in vacuo* to give quantitative recovery of material, which however could not be induced to yield single crystalline products. UV-vis: (THF)  $\lambda_{\text{max}}$  467(sh) 535, 589, 667 nm.

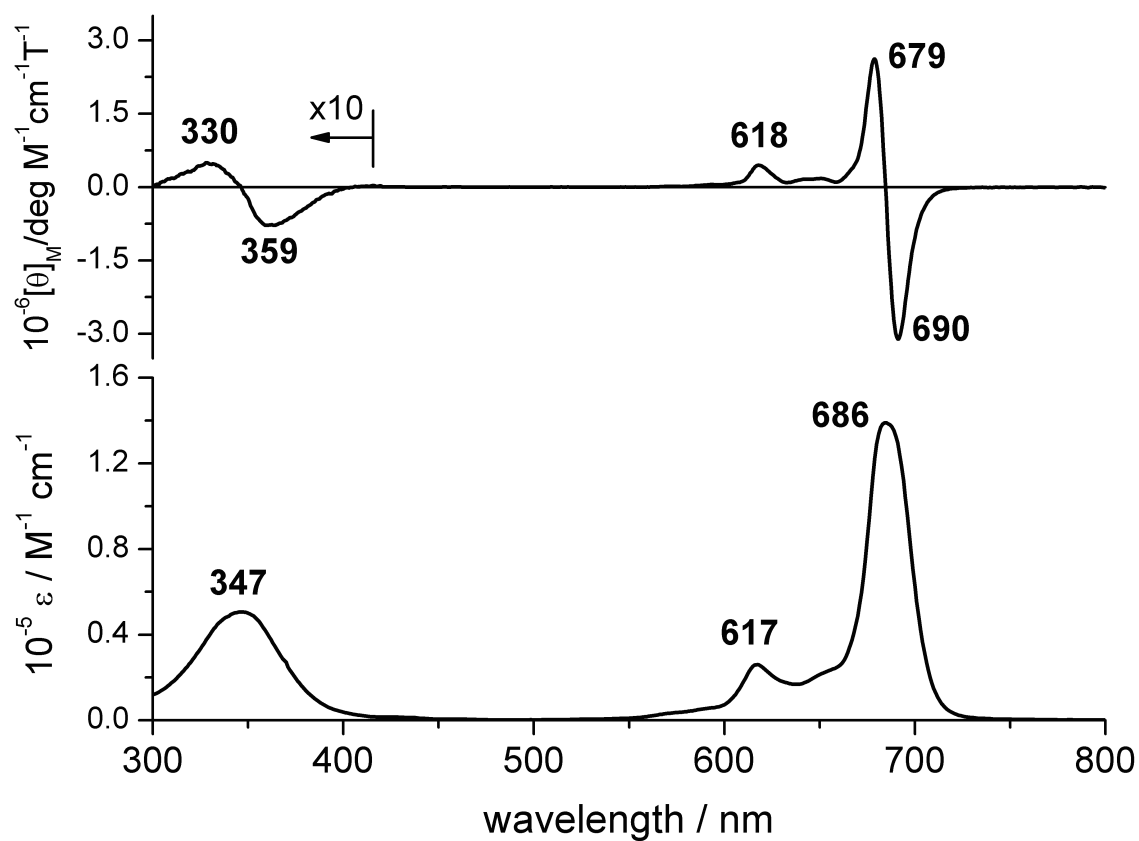

**Figure S1.** Electronic absorption (bottom) and magnetic circular dichroism (top) spectra of **1** in DMSO (concentration =  $5.6 \times 10^{-6}$  M).

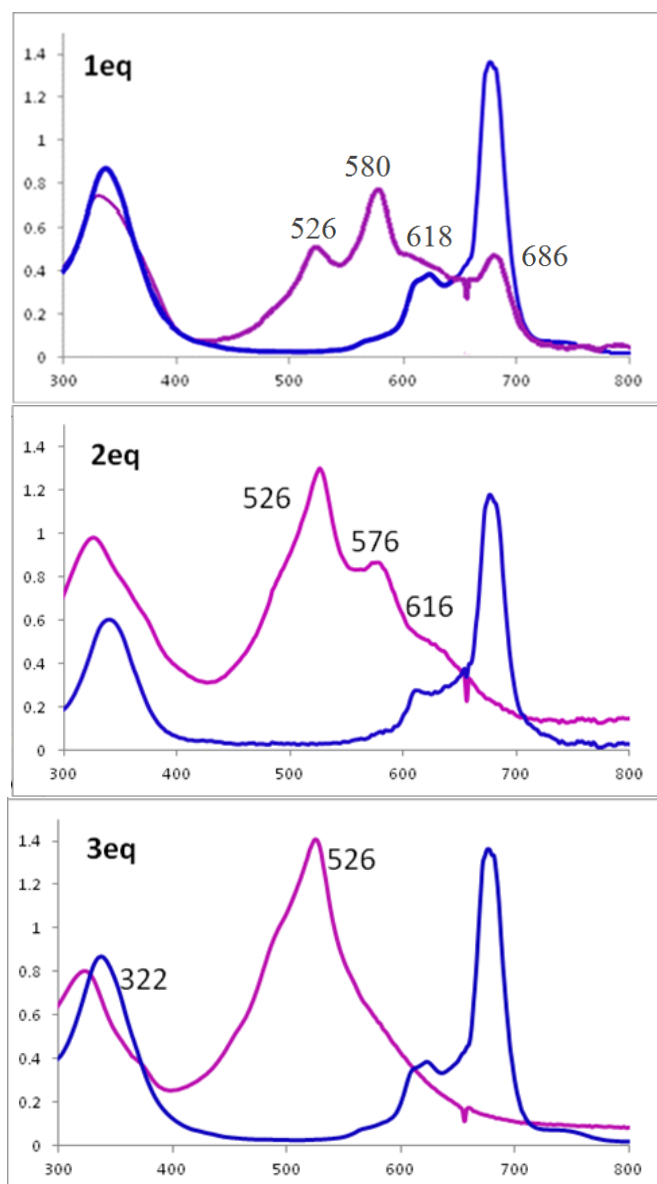

**Figure S2.** Absorption spectra of the products of reduction of **1** with one, two or three equivalents of  $\text{KC}_8$  (pink lines) and the re-oxidized products (blue lines). The spectrum for the 2 equiv. reaction is contaminated with some  $\text{Pc}^{3-}$  species, likely due to slight oxidation during the UV-vis data collection.

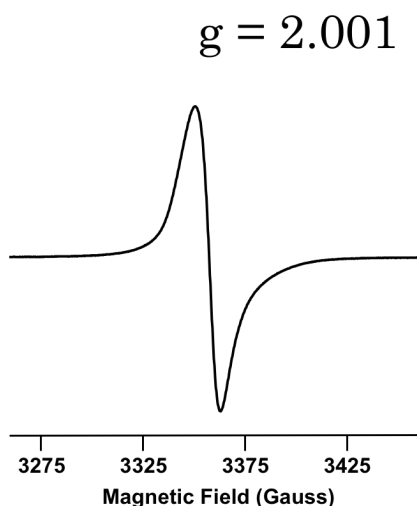

**Figure S3.** EPR spectrum of **2-K** in THF at 77 K.

**Table S1.** X-ray crystallographic data for complexes **1** and **3-Li**.

|                                                                                        | <b>1</b>                                                                        | <b>3-Li</b>                                                                                                     |
|----------------------------------------------------------------------------------------|---------------------------------------------------------------------------------|-----------------------------------------------------------------------------------------------------------------|
| Compound reference                                                                     | PcZrCl <sub>2</sub>                                                             | PcZr(LiCl) <sub>1.5</sub> (DME) <sub>3</sub>                                                                    |
| Chemical formula                                                                       | C <sub>64</sub> H <sub>32</sub> Cl <sub>4</sub> N <sub>16</sub> Zr <sub>2</sub> | C <sub>88</sub> H <sub>77</sub> Cl <sub>3</sub> Li <sub>3</sub> N <sub>16</sub> O <sub>12</sub> Zr <sub>2</sub> |
| Formula Mass                                                                           | 1349.29                                                                         | 1860.26                                                                                                         |
| Crystal system                                                                         |                                                                                 |                                                                                                                 |
| <i>a</i> /Å                                                                            | 9.7144(3)                                                                       | 13.5859(4)                                                                                                      |
| <i>b</i> /Å                                                                            | 11.9970(3)                                                                      | 24.4074(7)                                                                                                      |
| <i>c</i> /Å                                                                            | 12.1652(3)                                                                      | 32.2986(9)                                                                                                      |
| $\alpha$ /°                                                                            | 80.502(2)                                                                       | 90                                                                                                              |
| $\beta$ /°                                                                             | 76.732(2)                                                                       | 90.1560(18)                                                                                                     |
| $\gamma$ /°                                                                            | 81.249(2)                                                                       | 90                                                                                                              |
| Unit cell volume/Å <sup>3</sup>                                                        | 1351.34(6)                                                                      | 10710.1(5)                                                                                                      |
| Temperature/K                                                                          | 299(2)                                                                          | 150(2)                                                                                                          |
| Space group                                                                            | <i>P</i> $\bar{1}$                                                              | <i>P</i> 21/ <i>c</i>                                                                                           |
| No. of formula units per unit cell, <i>Z</i>                                           | 1                                                                               | 4                                                                                                               |
| Radiation type                                                                         | Mo K $\alpha$                                                                   | CuK $\alpha$                                                                                                    |
| Absorption coefficient, $\mu$ /mm <sup>-1</sup>                                        | 0.645                                                                           | 2.753                                                                                                           |
| No. of reflections measured                                                            | 14246                                                                           | 207765                                                                                                          |
| No. of independent reflections                                                         | 4697                                                                            | 18907                                                                                                           |
| <i>R</i> <sub>int</sub>                                                                | 0.0555                                                                          | 0.0621                                                                                                          |
| Final <i>R</i> <sub>I</sub> values ( <i>I</i> > 2 $\sigma$ ( <i>I</i> ))               | 0.0528                                                                          | 0.0757                                                                                                          |
| Final <i>wR</i> ( <i>F</i> <sup>2</sup> ) values ( <i>I</i> > 2 $\sigma$ ( <i>I</i> )) | 0.1227                                                                          | 0.2312                                                                                                          |
| Final <i>R</i> <sub>I</sub> values (all data)                                          | 0.0953                                                                          | 0.0844                                                                                                          |
| Final <i>wR</i> ( <i>F</i> <sup>2</sup> ) values (all data)                            | 0.1447                                                                          | 0.2417                                                                                                          |
| Goodness of fit on <i>F</i> <sup>2</sup>                                               | 1.022                                                                           | 1.066                                                                                                           |
